P2732

### Prevalence of electrocardiographic abnormalities in patients with cardiac amyloidosis

R. Martone<sup>1</sup>, G. Taborchi<sup>1</sup>, S. Bartolini<sup>1</sup>, S. Morini<sup>1</sup>, A. Lossi<sup>2</sup>, S. Perlini<sup>3</sup>, R. Mussinelli<sup>3</sup>, A. Sabena<sup>3</sup>, G. Palladini<sup>3</sup>, M. Gabriele<sup>4</sup>, E. Vignini<sup>4</sup>, C. Di Mario<sup>4</sup>, I. Olivetto<sup>5</sup>, F. Perfetto<sup>1</sup>, F. Cappelli<sup>1</sup>

<sup>1</sup>Careggi University Hospital (AOUC), Tuscan Regional Amyloid Center, Florence, Italy; <sup>2</sup>University of Florence, Florence, Italy; <sup>3</sup>Amyloidosis Research and Treatment Center, Pavia, Italy; <sup>4</sup>Careggi University Hospital (AOUC), Florence, Italy; <sup>5</sup>Careggi University Hospital (AOUC), Cardiomyopathy Unit, Florence, Italy

**Background:** Electrocardiographic (ECG) abnormalities are common in patients presenting with Light-Chain (AL) or Transthyretin (ATTR) related Cardiac Amyloidosis (CA). Type of amyloid may differently affect electrical properties of the heart being responsible for variable patterns of ECG anomalies at presentation.

**Purpose:** In this retrospective, observational study we sought to compare prevalence of ECG abnormalities between AL and ATTR patients with CA.

**Methods:** Clinical files from two Referral Centres were reviewed; ECG recordings were analysed by trained cardiologists and relevant findings were reported about rhythm (sinus vs atrial fibrillation [AF]), grade I or grade II atrio-ventricular (AV) delays, intra-ventricular (IV) conduction abnormalities, low-voltage QRS and pseudo-necrosis pattern. Presence of pace-maker (PM) and stimulated QRS were regarded to as clinical equivalents for AV block, after review of indications to implantation.

**Results:** Two hundred and fifty-one patients were identified (127 ATTR vs 124 AL; among ATTR, 27 patients had mutation in TTR gene: 10 Val142Ile, 11 Ile88Leu, 6 other). As expected, most ATTR patients were male (89% vs 56% in AL,  $p < 0.001$ ), and AL patients were younger (mean age 64 [53–70] vs 79 [73–83];  $p < 0.001$ ).

Pathological ECG findings were common in both subgroups, involving

more than three-quarters of the overall population (82% in ATTR, vs 72% in AL,  $p = 0.06$ ). Atrial fibrillation was more common in ATTR, prevailing in 39% vs 5.6% ( $p < 0.001$ ). ATTR had a higher burden of AV block (53% vs 13%,  $p < 0.001$ ) and IV conduction delays (43% vs 21%,  $p < 0.001$ ), and consistently presented a higher prevalence of PMs (24 patients vs 1). Low-voltage QRS was more prevalent in AL patients (52% vs 28%,  $p < 0.001$ ), while no significant difference was found in prevalence of pseudo-necrosis patterns (ATTR: 29%, AL: 40%;  $p$ : ns).

Due to imbalance in age and gender and relative possible confounding effect on rhythm disturbances, adjusted odds ratios (OR) were calculated. It resulted that ATTR was independently associated with a higher prevalence of AF and AV conduction delays when compared to AL (adjusted OR: 4 [95% CI: 1.4–11.2],  $p = 0.008$ , and 6.2 [95% CI: 2.6–14.9],  $p < 0.001$ ; respectively), while being inversely associated with low-voltage QRS (adjusted OR: 0.4 [95% CI: 0.2–0.9],  $p = 0.026$ ).

**Conclusions:** ECG abnormalities are common in CA. Rhythm disturbances are more prevalent in ATTR, while AL more often results in low-voltage QRS. Such differences remain relevant after adjustment for age and gender imbalance, thus suggesting an aetiology-specific link.
